# Supplementary material for: Post-marketing active surveillance of myocarditis and pericarditis following vaccination with COVID-19 mRNA vaccines in persons aged 12-39 years in Italy: a multi-database, self-controlled case series study
Source: bioRxiv or medRxiv preprint supplement (doi:10.1101/2022.02.07.22270020), 2022-02-08
Supplement: Supplementary file [file media-1.pdf]

**SUPPLEMENTARY MATERIAL**

**Post-marketing active surveillance of myocarditis and pericarditis following vaccination with COVID-19 mRNA vaccines in persons aged 12-39 years in Italy: a multi-database, self-controlled case series study**

Massari M & Spila Alegiani S et al.

**Figure S1-** Diagram showing the data flow when using *TheShinISS* to locally elaborate health care data structured according to a Common Data Model.

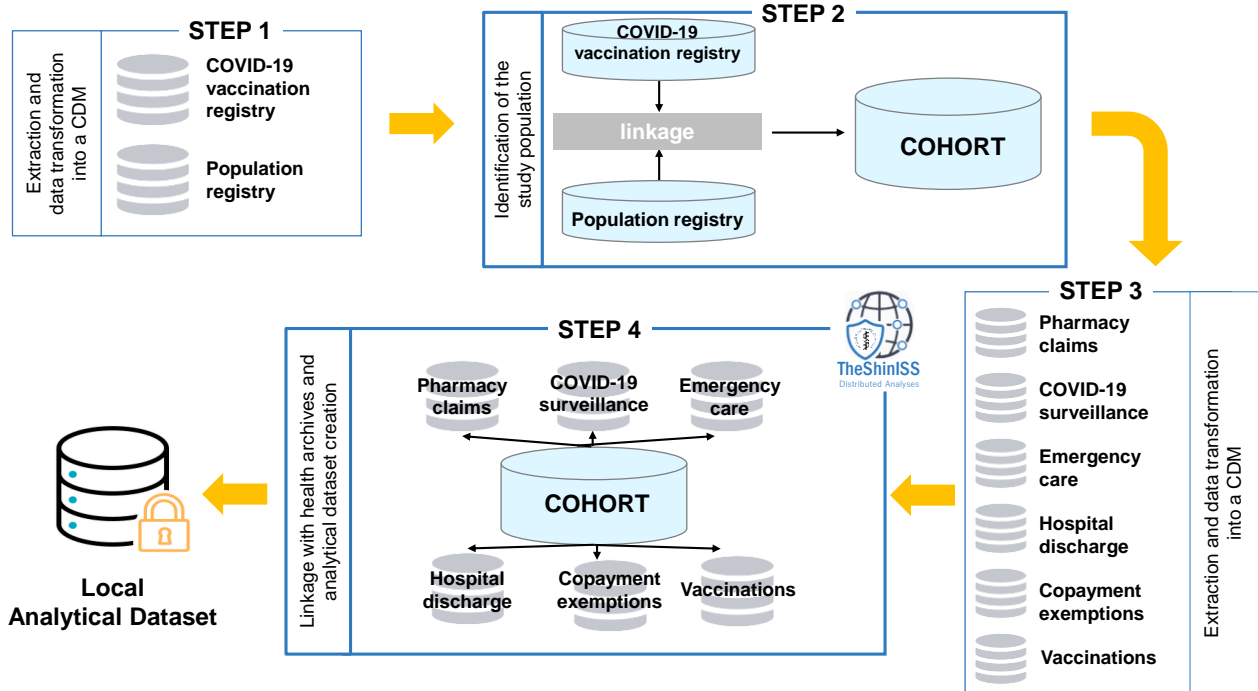

CDM: Common Data Model

**Table S1.** Definition of study comorbidities.

| Comorbidities                               | Databases                                                    |                                                                    |                                   |
|---------------------------------------------|--------------------------------------------------------------|--------------------------------------------------------------------|-----------------------------------|
|                                             | Hospital discharge                                           | Pharmacy claims                                                    | Copayment exemption               |
|                                             | ICD 9-CM codes<br>(in the last 5 years)                      | ATC codes<br>(in the last 12 months)                               | Exemption codes                   |
| COPD                                        | 490; 492; 493; 494;<br>496                                   | R03                                                                | 057; 007                          |
| Chronic pulmonary disease                   | 480-488; 491; 495;<br>518.81-518.84                          | J05AH                                                              | 024                               |
| Chronic kidney failure                      | 580; 582-585; 593;<br>753.12-753.14                          |                                                                    | 023; 022; 061; 062                |
| Neoplasms                                   | 140-209, V10                                                 | L01                                                                | 048                               |
| Diabetes mellitus                           | 250                                                          | A10                                                                | 013                               |
| Hematologic disease                         | 280-284; 285<br>(excl.285.1); 286-289                        | B01AA; B01AB; B01AE;<br>B01AF; B01AX; B02BD; B03                   | 003                               |
| Cardiovascular and cerebrovascular diseases | 390-398; 406-459                                             | B01AC; C01B; C01DA;<br>C08DA; C08DB                                | 002; 021<br>0A02; 0B02; 0C02; 036 |
| Hypertension                                | 401-405                                                      | C02; C03; C07; C08 (excl.<br>C08DA; C08DB); C09                    | 031; 0A31; 0031                   |
| Hepatopathy                                 | 456.0-456.2; 571-<br>572; 573.0                              |                                                                    | 008; 016                          |
| Dementia /Alzheimer                         | 290; 294.1; 331.2                                            | N06DA, N06DX                                                       | 011; 029                          |
| HIV                                         | 042                                                          | J05AE; J05AF; J05AG; J05AR                                         | 020                               |
| Rheumatic diseases                          | 446.5; 710; 714; 720;<br>725; 696                            | L04                                                                | 006;028; 030; 045;<br>054; 067    |
| Cystic fibrosis                             | 277.0                                                        | R07AX                                                              | 018                               |
| Neurological diseases                       | 296.3; 238.7; 311;<br>332; 340; 345; 348.39                  | N03A; N04B; N05A; N06A                                             | 017; 038; 044; 046                |
| Peptic Ulcer                                | 531-533                                                      | A02B                                                               |                                   |
| Colitis                                     | 555; 556                                                     |                                                                    | 009                               |
| Celiac disease                              | 579.0                                                        |                                                                    | 059                               |
| Infection (in the last 12 months)           | 053; 599.0; 010-018;<br>031; 078.5; 052-054;<br>136.3; 117.5 | J01; J02; J04; J05 (excl.<br>J05AE; J05AF; J05AG; J05AR;<br>J05AH) | 055                               |
| Corticosteroids for systemic use            |                                                              | H02A                                                               |                                   |
| NSAIDs use                                  |                                                              | M01A                                                               |                                   |
| Estroprogestinics use                       |                                                              | G03                                                                |                                   |

ICD: International Classification of Disease; ATC: Anatomical Therapeutic Chemical Classification System; COPD: Chronic obstructive pulmonary disease; HIV: Human Immunodeficiency Virus; NSAIDs: Non-steroidal anti-inflammatory drugs

**Table S2** - Relative incidence estimated by adjusted SCCS and excess cases per 100,000 vaccinated by risk intervals: 232 myocarditis and/or pericarditis events in the BNT162b2 vaccinated males aged 12-39 years from 27 December 2020 to 30 September 2021.

| Risk interval | Dose   | Events in the risk interval (n) | Adjusted Relative Incidence (95% CI)* | Excess cases per 100,000 vaccinated (95% CI)** |
|---------------|--------|---------------------------------|---------------------------------------|------------------------------------------------|
| [0-7)         | Dose 1 | 9                               | 1.53 (0.71-3.31)                      |                                                |
|               | Dose 2 | 13                              | 3.45 (1.78-6.68)                      | 1.0 (0.6-1.2)                                  |
| [7-14)        | Dose 1 | 9                               | 1.53 (0.74-3.17)                      |                                                |
|               | Dose 2 | 4                               | 1.01 (0.37-2.75)                      |                                                |
| [14-21)       | Dose 1 | 8                               | 1.41 (0.63-3.14)                      |                                                |
|               | Dose 2 | 5                               | 1.29 (0.49-3.42)                      |                                                |
| Ref.          |        | 184                             | 1.0                                   |                                                |

SCCS: Self-Controlled Cases Series; n.: number; CI: Confidence interval; Ref.: reference period (unexposed period). \*adjusted by calendar period; \*\*excess cases are not given when RI did not show a statistically significant increase of incidence over the [0-21) risk interval

**Table S3** - Relative incidence estimated by adjusted SCCS and excess cases per 100,000 vaccinated by risk intervals: 114 myocarditis and/or pericarditis events in the BNT162b2 vaccinated females aged 12-39 years from 27 December 2020 to 30 September 2021.

| Risk interval | Dose   | Events in the risk interval (n) | Adjusted Relative Incidence (95% CI)* | Excess cases per 100,000 vaccinated (95% CI)** |
|---------------|--------|---------------------------------|---------------------------------------|------------------------------------------------|
| [0-7)         | Dose 1 | 5                               | 0.88 (0.34-2.32)                      |                                                |
|               | Dose 2 | 9                               | 3.38 (1.47-7.74)                      | 0.7 (0.3-0.9)                                  |
| [7-14)        | Dose 1 | 1                               | 0.19 (0.02-1.63)                      |                                                |
|               | Dose 2 | 3                               | 1.16 (0.35-3.85)                      |                                                |
| [14-21)       | Dose 1 | 3                               | 0.71 (0.21-2.44)                      |                                                |
|               | Dose 2 | 5                               | 2.01 (0.72-5.62)                      |                                                |
| Ref.          |        | 88                              | 1.0                                   |                                                |

SCCS: Self-Controlled Cases Series; n.: number; CI: Confidence interval; Ref.: reference period (unexposed period). \*adjusted by calendar period; \*\*excess cases are not given when RI did not show a statistically significant increase of incidence over the [0-21) risk interval

**Table S4** - Relative incidence estimated by adjusted SCCS and excess cases per 100,000 vaccinated by risk intervals: 46 myocarditis and/or pericarditis events in the BNT162b2 vaccinated population aged 12-17 years from 27 December 2020 to 30 September 2021.

| Risk interval | Dose   | Events in the risk interval (n) | Adjusted Relative Incidence (95% CI)* | Excess cases per 100,000 vaccinated (95% CI)** |
|---------------|--------|---------------------------------|---------------------------------------|------------------------------------------------|
| [0-7)         | Dose 1 | 3                               | 1.06 (0.17-6.59)                      |                                                |
|               | Dose 2 | 7                               | 5.74 (1.52-21.72)                     | 1.7 (0.7-1.9)                                  |
| [7-14)        | Dose 1 | 3                               | 0.99 (0.24-4.19)                      |                                                |
|               | Dose 2 | 1                               | 0.74 (0.11-5.15)                      |                                                |
| [14-21)       | Dose 1 | 1                               | 0.36 (0.05-2.72)                      |                                                |
|               | Dose 2 | 0                               | —                                     |                                                |
| Ref.          |        | 31                              | 1.0                                   |                                                |

SCCS: Self-Controlled Cases Series; n.: number; CI: Confidence interval; Ref.: reference period (unexposed period). \*adjusted by calendar period; \*\*excess cases are not given when RI did not show a statistically significant increase of incidence over the [0-21) risk interval

**Table S5** - Relative incidence estimated by adjusted SCCS and excess cases per 100,000 vaccinated by risk intervals: 154 myocarditis and/or pericarditis events in the BNT162b2 vaccinated population aged 18-29 years from 27 December 2020 to 30 September 2021.

| Risk interval | Dose   | Events in the risk interval (n) | Adjusted Relative Incidence (95% CI)* | Excess cases per 100,000 vaccinated (95% CI)** |
|---------------|--------|---------------------------------|---------------------------------------|------------------------------------------------|
| [0-7)         | Dose 1 | 7                               | 1.76 (0.76-4.05)                      |                                                |
|               | Dose 2 | 11                              | 4.02 (1.81-8.91)                      | 1.1 (0.6-1.3)                                  |
| [7-14)        | Dose 1 | 3                               | 0.72 (0.20-2.61)                      |                                                |
|               | Dose 2 | 4                               | 1.46 (0.51-4.14)                      |                                                |
| [14-21)       | Dose 1 | 4                               | 1.00 (0.34-2.96)                      |                                                |
|               | Dose 2 | 4                               | 1.56 (0.55-4.44)                      |                                                |
| Ref.          |        | 121                             | 1.0                                   |                                                |

SCCS: Self-Controlled Cases Series; n.: number; CI: Confidence interval; Ref.: reference period (unexposed period). \*adjusted by calendar period; \*\*excess cases are not given when RI did not show a statistically significant increase of incidence over the [0-21) risk interval

**Table S6**- Relative incidence estimated by adjusted SCCS and excess cases per 100,000 vaccinated by risk intervals: 146 myocarditis and/or pericarditis events in the BNT162b2 vaccinated population aged 30-39 years from 27 December 2020 to 30 September 2021.

| Risk interval | Dose   | Events in the risk interval (n) | Adjusted Relative Incidence (95% CI)* | Excess cases per 100,000 vaccinated (95% CI)** |
|---------------|--------|---------------------------------|---------------------------------------|------------------------------------------------|
| [0-7)         | Dose 1 | 4                               | 0.86 (0.31-2.38)                      |                                                |
|               | Dose 2 | 4                               | 1.64 (0.59-4.53)                      |                                                |
| [7-14)        | Dose 1 | 4                               | 0.97 (0.34-2.80)                      |                                                |
|               | Dose 2 | 2                               | 0.84 (0.21-3.38)                      |                                                |
| [14-21)       | Dose 1 | 6                               | 1.68 (0.70-4.04)                      |                                                |
|               | Dose 2 | 6                               | 2.50 (0.97-6.45)                      |                                                |
| Ref.          |        | 120                             | 1.0                                   |                                                |

SCCS: Self-Controlled Cases Series; n.: number; CI: Confidence interval; Ref.: reference period (unexposed period). \*adjusted by calendar period; \*\*excess cases are not given when RI did not show a statistically significant increase of incidence over the [0-21) risk interval

**Table S7** - Relative incidence estimated by adjusted SCCS and excess cases per 100,000 vaccinated by risk intervals: 70 myocarditis and/or pericarditis events in the mRNA-1273 vaccinated males aged 12-39 years from 27 December 2020 to 30 September 2021.

| Risk interval | Dose   | Events in the risk interval (n) | Adjusted Relative Incidence (95% CI)* | Excess cases per 100,000 vaccinated (95% CI)** |
|---------------|--------|---------------------------------|---------------------------------------|------------------------------------------------|
| [0-7)         | Dose 1 | 10                              | 12.28 (4.09-36.83)                    | 3.8 (3.1-4.0)                                  |
|               | Dose 2 | 19                              | 11.91 (3.88-36.53)                    | 8.8 (7.2-9.4)                                  |
| [7-14)        | Dose 1 | 2                               | 2.19 (0.42-11.41)                     |                                                |
|               | Dose 2 | 0                               | —                                     |                                                |
| [14-21)       | Dose 1 | 0                               | —                                     |                                                |
|               | Dose 2 | 1                               | 0.65 (0.08-5.37)                      |                                                |
| Ref.          |        | 38                              | 1.0                                   |                                                |

SCCS: Self-Controlled Cases Series; n.: number; CI: Confidence interval; Ref.: reference period (unexposed period). \*adjusted by calendar period; \*\*excess cases are not given when RI did not show a statistically significant increase of incidence over the [0-21) risk interval

**Table S8** - Relative incidence estimated by adjusted SCCS and excess cases per 100,000 vaccinated by risk intervals: 25 myocarditis and/or pericarditis events in the mRNA-1273 vaccinated females aged 12-39 years from 27 December 2020 to 30 September 2021.

| Risk interval | Dose   | Events in the risk interval (n) | Adjusted Relative Incidence (95% CI)* | Excess cases per 100,000 vaccinated (95% CI)** |
|---------------|--------|---------------------------------|---------------------------------------|------------------------------------------------|
| [0-7)         | Dose 1 | 1                               | 0.69 (0.08-5.75)                      |                                                |
|               | Dose 2 | 4                               | 2.08 (0.45-9.72)                      |                                                |
| [7-14)        | Dose 1 | 1                               | 0.69 (0.10-4.87)                      |                                                |
|               | Dose 2 | 0                               | —                                     |                                                |
| [14-21)       | Dose 1 | 1                               | 0.69 (0.07-6.86)                      |                                                |
|               | Dose 2 | 1                               | 0.72 (0.13-4.05)                      |                                                |
| Ref.          |        | 17                              | 1.0                                   |                                                |

SCCS: Self-Controlled Cases Series; n.: number; CI: Confidence interval; Ref.: reference period (unexposed period). \*adjusted by calendar period; \*\*excess cases are not given when RI did not show a statistically significant increase of incidence over the [0-21) risk interval

**Table S9** - Relative incidence estimated by adjusted SCCS and excess cases per 100,000 vaccinated by risk intervals: 11 myocarditis and/or pericarditis events in the mRNA-1273 vaccinated population aged 12-17 years from 27 December 2020 to 30 September 2021.

| Risk interval | Dose   | Events in the risk interval (n) | Adjusted Relative Incidence (95% CI)*§ | Excess cases per 100,000 vaccinated (95% CI)** |
|---------------|--------|---------------------------------|----------------------------------------|------------------------------------------------|
| [0-7)         | Dose 1 | 0                               |                                        |                                                |
|               | Dose 2 | 3                               |                                        |                                                |
| [7-14)        | Dose 1 | 0                               |                                        |                                                |
|               | Dose 2 | 0                               |                                        |                                                |
| [14-21)       | Dose 1 | 0                               |                                        |                                                |
|               | Dose 2 | 1                               |                                        |                                                |
| Ref.          |        | 7                               |                                        |                                                |

SCCS: Self-Controlled Cases Series; n.: number; CI: Confidence interval; Ref.: reference period (unexposed period). \*adjusted by calendar period; \*\*excess cases are not given when RI did not show a statistically significant increase of incidence over the [0-21) risk interval; §considering the small number of cases in this age group, it was not possible to provide any estimates.

**Table S10** - Relative incidence estimated by adjusted SCCS and excess cases per 100,000 vaccinated by risk intervals: 57 myocarditis and/or pericarditis events in the mRNA-1273 vaccinated population aged 18-29 years from 27 December 2020 to 30 September 2021.

| Risk interval | Dose   | Events in the risk interval (n) | Adjusted Relative Incidence (95% CI)* | Excess cases per 100,000 vaccinated (95% CI)** |
|---------------|--------|---------------------------------|---------------------------------------|------------------------------------------------|
| [0-7)         | Dose 1 | 9                               | 7.58 (2.62-21.94)                     | 3.5 (2.4-3.8)                                  |
|               | Dose 2 | 18                              | 9.58 (3.32-27.58)                     | 8.3 (6.7-9.2)                                  |
| [7-14)        | Dose 1 | 1                               | 0.78 (0.09-6.51)                      |                                                |
|               | Dose 2 | 0                               | —                                     |                                                |
| [14-21)       | Dose 1 | 0                               | —                                     |                                                |
|               | Dose 2 | 1                               | 0.55 (0.07-4.37)                      |                                                |
| <i>Ref.</i>   |        | 28                              | 1.0                                   |                                                |

SCCS: Self-Controlled Cases Series; n.: number; CI: Confidence interval; Ref.: reference period (unexposed period). \*adjusted by calendar period; \*\*excess cases are not given when RI did not show a statistically significant increase of incidence over the [0-21) risk interval

**Table S11** - Relative incidence estimated by adjusted SCCS and excess cases per 100,000 vaccinated by risk intervals: 27 myocarditis and/or pericarditis events in the mRNA-1273 vaccinated population aged 30-39 years from 27 December 2020 to 30 September 2021.

| Risk interval | Dose   | Events in the risk interval (n) | Adjusted Relative Incidence (95% CI)* | Excess cases per 100,000 vaccinated (95% CI)** |
|---------------|--------|---------------------------------|---------------------------------------|------------------------------------------------|
| [0-7)         | Dose 1 | 2                               | 6.57 (1.32-32.63)                     | 1.0 (0.3-1.1)                                  |
|               | Dose 2 | 2                               | 3.22 (0.69-15.10)                     |                                                |
| [7-14)        | Dose 1 | 2                               | 5.87 (1.34-25.74)                     | 1.0 (0.3-1.1)                                  |
|               | Dose 2 | 0                               | —                                     |                                                |
| [14-21)       | Dose 1 | 1                               | 2.56 (0.23-28.57)                     |                                                |
|               | Dose 2 | 0                               | —                                     |                                                |
| <i>Ref.</i>   |        | 20                              | 1.0                                   |                                                |

SCCS: Self-Controlled Cases Series; n.: number; CI: Confidence interval; Ref.: reference period (unexposed period). \*adjusted by calendar period; \*\*excess cases are not given when RI did not show a statistically significant increase of incidence over the [0-21) risk interval

**Figure S2-** Relative Incidence in the [0-7) risk period after mRNA vaccination in the vaccinated population aged 12-39 years from 27 December 2020 to 30 September 2021 by vaccine brand, gender and age group.

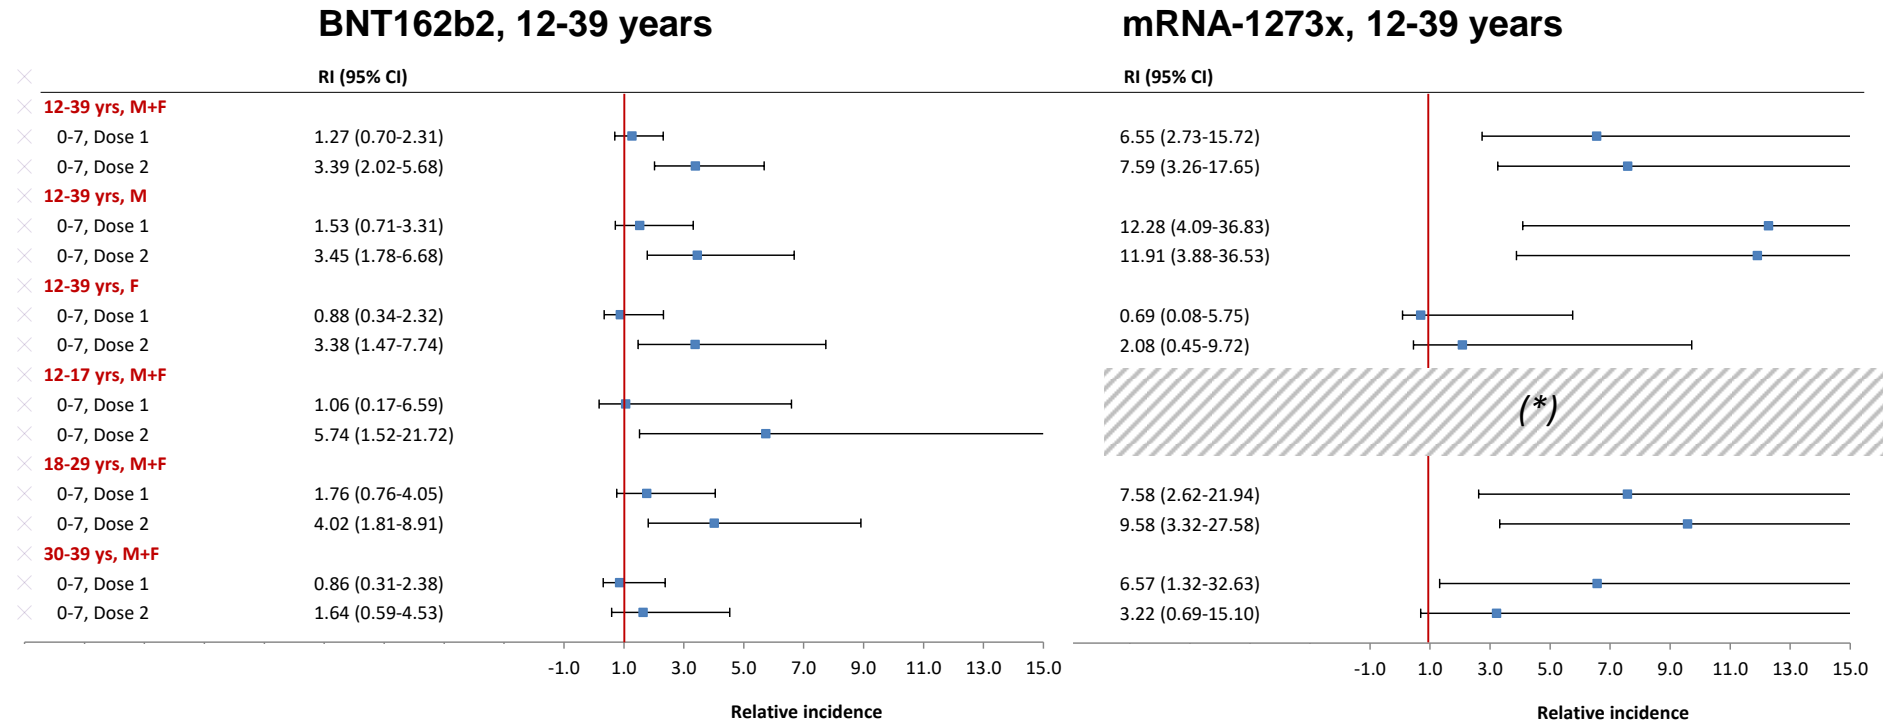

RI: Relative Incidence; CI: Confidence Interval; M: Males; F: Females. (\*) Considering the small number of cases in the vaccinated with mRNA-1273 of age 12-17 years, it was not possible to provide any estimates

**Table S12 – Sensitivity analyses.**

|                                                                                                                                                       | Risk interval | Dose          | Adjusted Relative Incidence (95% CI)* |                          |
|-------------------------------------------------------------------------------------------------------------------------------------------------------|---------------|---------------|---------------------------------------|--------------------------|
|                                                                                                                                                       |               |               | BNT162b2                              | mRNA-1273                |
| <b>Primary analysis</b>                                                                                                                               | <b>[0-7]</b>  | <b>Dose 1</b> | <b>1.27 (0.70-2.31)</b>               | <b>6.55 (2.73-15.72)</b> |
|                                                                                                                                                       |               | <b>Dose 2</b> | <b>3.39 (2.02-5.68)</b>               | <b>7.59 (3.26-17.65)</b> |
| <b>a) SCCS standard</b><br>SCSS standard cutting the observation time at the first and second dose (n. 441)                                           | <b>[0-7]</b>  | Dose 1        | 1.27 (0.69-2.33)                      | 5.59 (2.37-13.17)        |
|                                                                                                                                                       |               | Dose 2        | 3.35 (1.98-5.69)                      | 6.20 (2.45-15.68)        |
| <b>b) Observation time period (I)</b><br>analysis restricted to the study period from 27 December 2020 to 31 May 2021 (n. 85)**                       | <b>[0-7]</b>  | Dose 1        | 0.48 (0.10-2.20)                      | ***                      |
|                                                                                                                                                       |               | Dose 2        | 3.29 (1.22-8.88)                      | ***                      |
| <b>b) Observation time period (II)</b><br>analysis restricted to the study period from 1 June 2021 to 30 September 2021 (n. 160)**                    | <b>[0-7]</b>  | Dose 1        | 2.05 (0.97-4.33)                      | 6.26 (2.15-15.22)        |
|                                                                                                                                                       |               | Dose 2        | 4.32 (2.11-8.83)                      | 13.43 (4.65-38.76)       |
| <b>b) Exposure time period</b><br>excluding day 0 from [0-7] day risk interval (n. 441)                                                               | <b>[0-7]</b>  | Dose 1        | 1.39 (0.75-2.55)                      | 7.68 (3.21-18.39)        |
|                                                                                                                                                       |               | Dose 2        | 3.96 (2.36-6.62)                      | 8.76 (3.78-20.29)        |
| <b>c) Heterologous vaccination (I)</b><br>primary analysis excluding individuals with two different brands in the first and second dose (n. 440)      | <b>[0-7]</b>  | Dose 1        | 1.27 (0.69-2.31)                      | 6.56 (2.73-15.74)        |
|                                                                                                                                                       |               | Dose 2        | 3.39 (2.02-5.68)                      | 7.59 (3.26-17.66)        |
| <b>c) Heterologous vaccination (II)</b><br>censoring 1 subjects who received a different brand on the II dose (from mRNA-1273 to BNT162b2)            | <b>[0-7]</b>  | Dose 1        | ***                                   | 6.61 (2.75-18.90)        |
|                                                                                                                                                       |               | Dose 2        |                                       | 7.61 (3.27-17.72)        |
| <b>d) SARS-CoV-2 infection</b><br>restricting the analyses to subjects without a SARS-CoV-2 positive test before and during the study period (n. 378) | <b>[0-7]</b>  | Dose 1        | 1.17 (0.64-2.25)                      | 5.66 (1.99-16.13)        |
|                                                                                                                                                       |               | Dose 2        | 3.13 (1.82-5.39)                      | 7.85 (3.26-18.94)        |

SCCS: Self-Controlled Cases Series; CI: Confidence interval. \*adjusted by calendar period; \*\*subjects vaccinated and with event in each period were included in this analysis \*\*\*considering the small number of cases, it was not possible to provide any estimates



**Table S13** – - Relative incidence estimated by adjusted SCCS and excess cases per 100,000 vaccinated by risk intervals: 1,759 myocarditis and/or pericarditis events in the BNT162b2 and 291 events in the mRNA-1273 vaccinated population aged ≥40 years from 27 December 2020 to 30 September 2021 (ancillary analysis).

| Gender        | Risk interval | Dose   | BNT162b2<br>Vaccinated 6,835,634 (n. cases 1,759) |                                       |                                                | mRNA-1273<br>Vaccinated 1,041,582 (n. cases 291) |                                       |                                                |
|---------------|---------------|--------|---------------------------------------------------|---------------------------------------|------------------------------------------------|--------------------------------------------------|---------------------------------------|------------------------------------------------|
|               |               |        | Events in the risk interval (n)                   | Adjusted Relative Incidence (95% CI)* | Excess cases per 100,000 Vaccinated (95% CI)** | Events in the risk interval (n)                  | Adjusted Relative Incidence (95% CI)* | Excess cases per 100,000 Vaccinated (95% CI)** |
| Males+Females | [0-7]         | Dose 1 | 39                                                | 0.59 (0.42-0.82)                      |                                                | 7                                                | 0.56 (0.23-1.36)                      |                                                |
|               |               | Dose 2 | 43                                                | 0.84 (0.61-1.16)                      |                                                | 10                                               | 1.11 (0.57-2.17)                      |                                                |
|               |               | Ref.   | 1,479                                             | 1                                     |                                                | 247                                              | 1                                     |                                                |
| Males         | [0-7]         | Dose 1 | 16                                                | 0.43 (0.26-0.71)                      |                                                | 1                                                | 0.12 (0.01-1.31)                      |                                                |
|               |               | Dose 2 | 23                                                | 0.85 (0.54-1.33)                      |                                                | 6                                                | 1.11 (0.47-2.66)                      |                                                |
|               |               | Ref.   | 824                                               | 1                                     |                                                | 134                                              | 1                                     |                                                |
| Females       | [0-7]         | Dose 1 | 23                                                | 0.76 (0.49-1.19)                      |                                                | 6                                                | 1.16 (0.46-2.92)                      |                                                |
|               |               | Dose 2 | 20                                                | 0.84 (0.53-1.33)                      |                                                | 4                                                | 1.11 (0.39-3.13)                      |                                                |
|               |               | Ref.   | 655                                               | 1                                     |                                                | 113                                              | 1                                     |                                                |

SCCS: Self-Controlled Cases Series; n.: number; CI: Confidence interval; Ref.: reference period (unexposed period). \*adjusted by calendar period; \*\*excess cases are not given when RI did not show a significant increase of incidence over the [0-21] risk interval
